# Supplementary material
Source: PubMed Central journal article supplement (PMC7261253)

**Figure S4**

**A**

|                                               | Cluster number                  | 1       | 2        | 3        | 4        | 5        | 6        | 7        | 8        | 9        | 10       | 11       | Total        |
|-----------------------------------------------|---------------------------------|---------|----------|----------|----------|----------|----------|----------|----------|----------|----------|----------|--------------|
| Wild type cells                               | # cells                         | 722     | 614      | 593      | 564      | 564      | 540      | 410      | 301      | 70       | 59       | 27       | <b>4,464</b> |
|                                               | % of total                      | 16.2    | 13.8     | 13.3     | 12.6     | 12.6     | 12.1     | 9.2      | 6.7      | 1.6      | 1.3      | 0.6      |              |
|                                               | # marker genes                  | 157     | 179      | 170      | 112      | 121      | 210      | 86       | 116      | 349      | 644      | 173      |              |
|                                               | mean(expr) > 0                  | 15,719  | 15,555   | 15,931   | 15,372   | 15,415   | 15,224   | 15,045   | 13,884   | 13,239   | 12,695   | 8,618    |              |
|                                               | mean(expr) > 0.5                | 2,046   | 2,212    | 2,163    | 1,913    | 1,900    | 1,781    | 1,881    | 1,545    | 2,013    | 1,644    | 452      |              |
|                                               | mean(expr) > 1                  | 823     | 864      | 810      | 717      | 745      | 650      | 731      | 631      | 805      | 580      | 194      |              |
| Spdh cells assigned to identified wt clusters | # cells                         | 765     | 415      | 433      | 270      | 637      | 867      | 269      | 348      | 57       | 39       | 47       | <b>4,147</b> |
|                                               | % of total                      | 18.4    | 10.0     | 10.4     | 6.5      | 15.4     | 20.9     | 6.5      | 8.4      | 1.4      | 0.9      | 1.1      |              |
|                                               | normalized cell ratio [WT/SPDH] | 0.87677 | 1.374454 | 1.272262 | 1.940552 | 0.822525 | 0.578608 | 1.415929 | 0.803521 | 1.140862 | 1.405391 | 0.533674 |              |

**B**

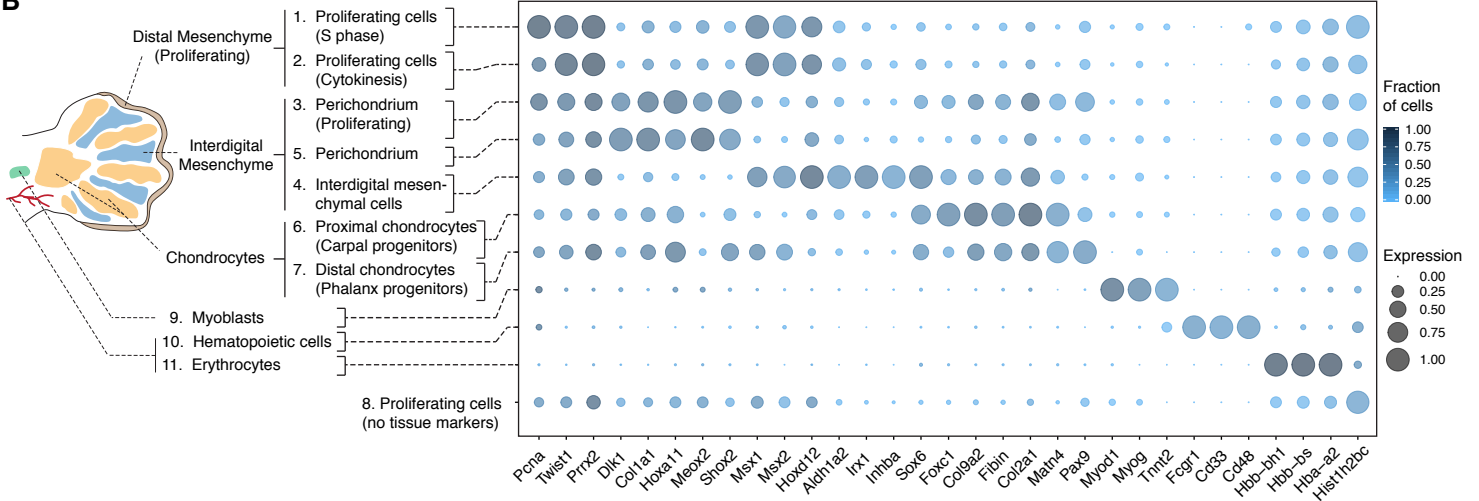

**C**

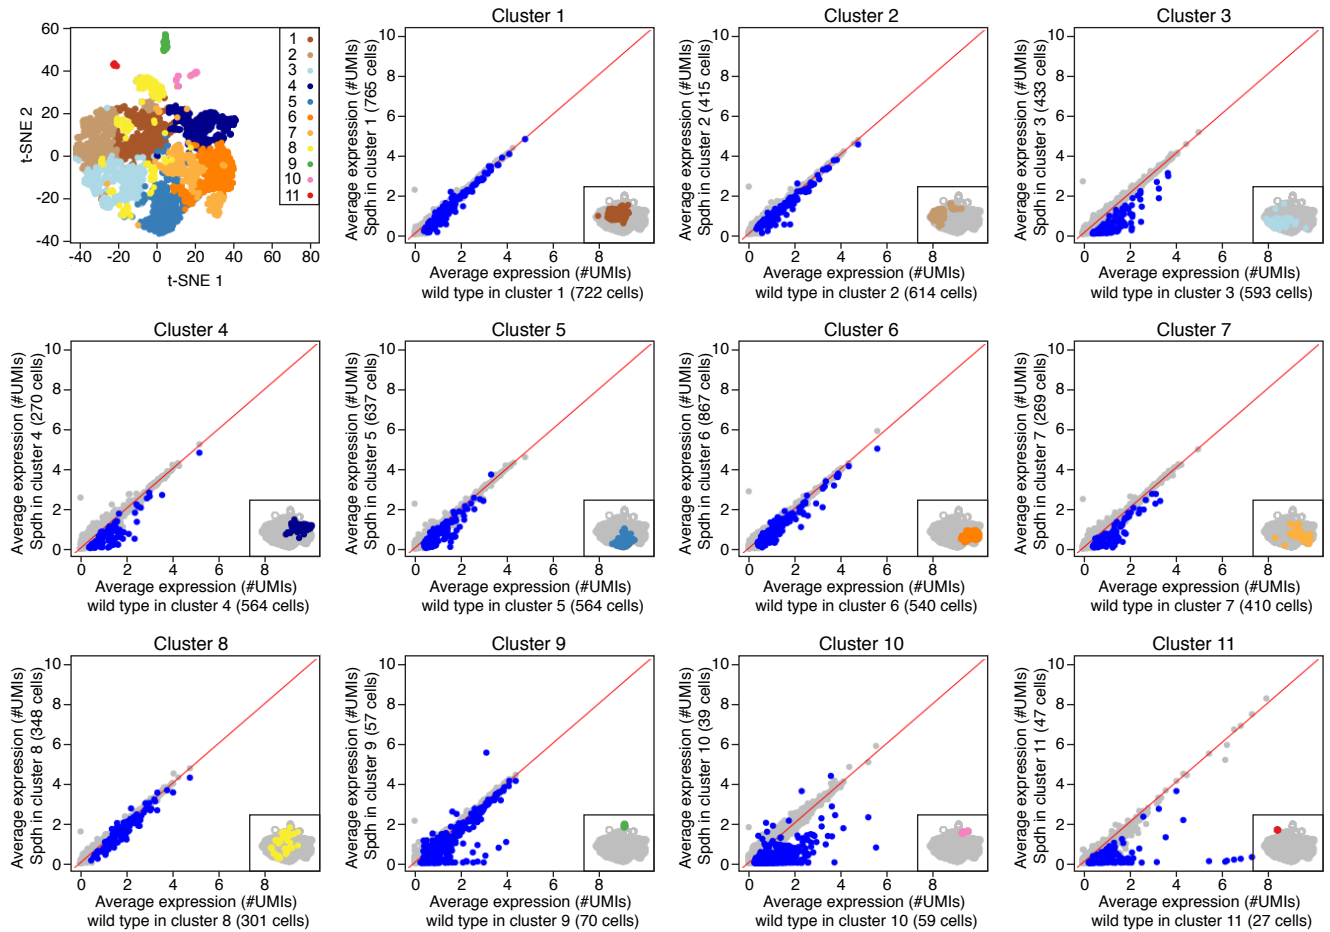

Supplement: NIHMS1586176-supplement-4.pdf [file NIHMS1586176-supplement-4.pdf]
