# Supplementary material
Source: PubMed Central journal article supplement (PMC7261253)

**Figure S1**

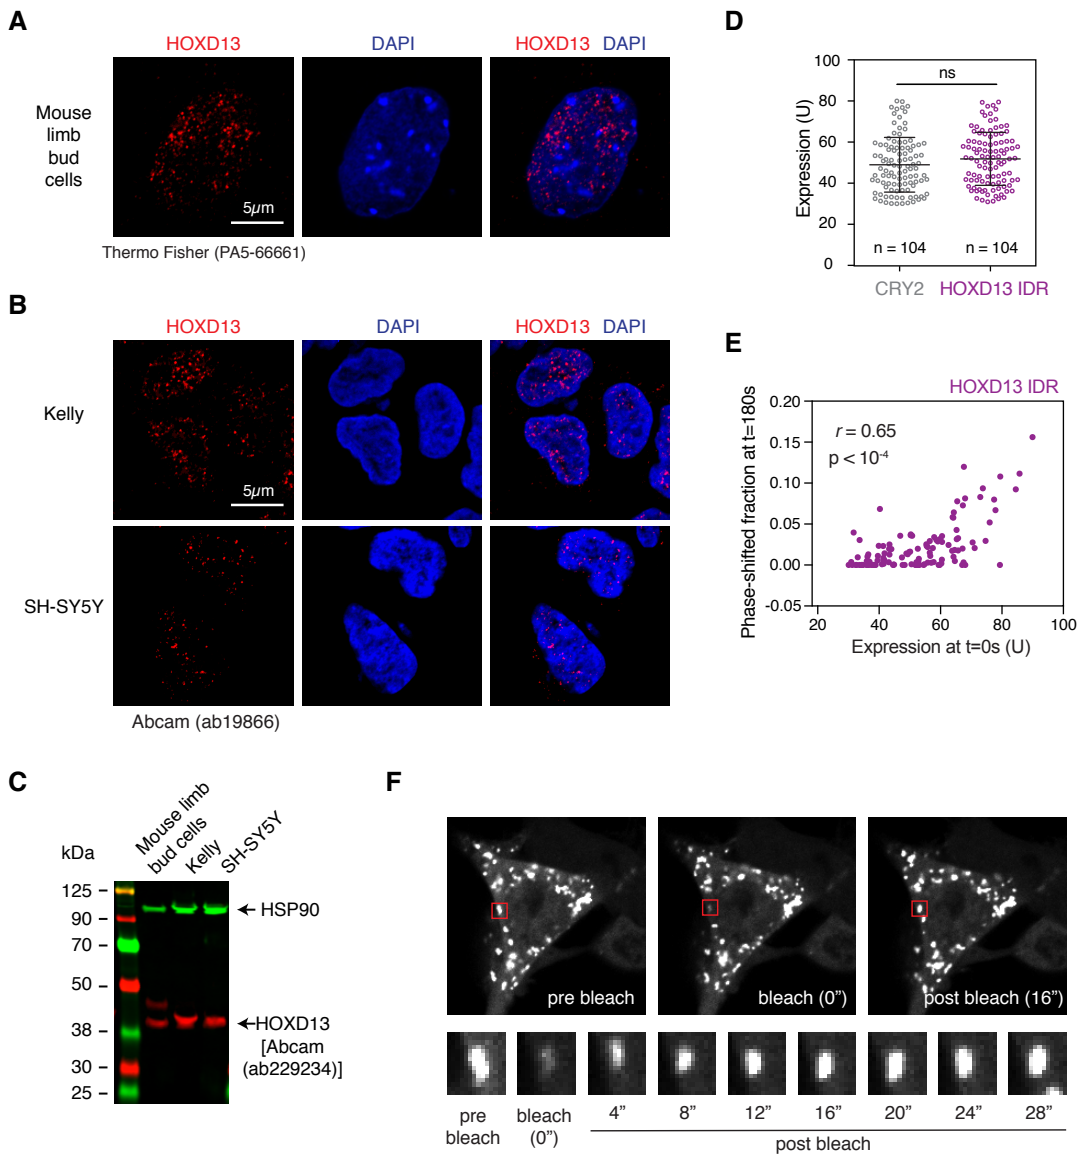

Supplement: NIHMS1586176-supplement-1.pdf [file NIHMS1586176-supplement-1.pdf]

**Figure S2**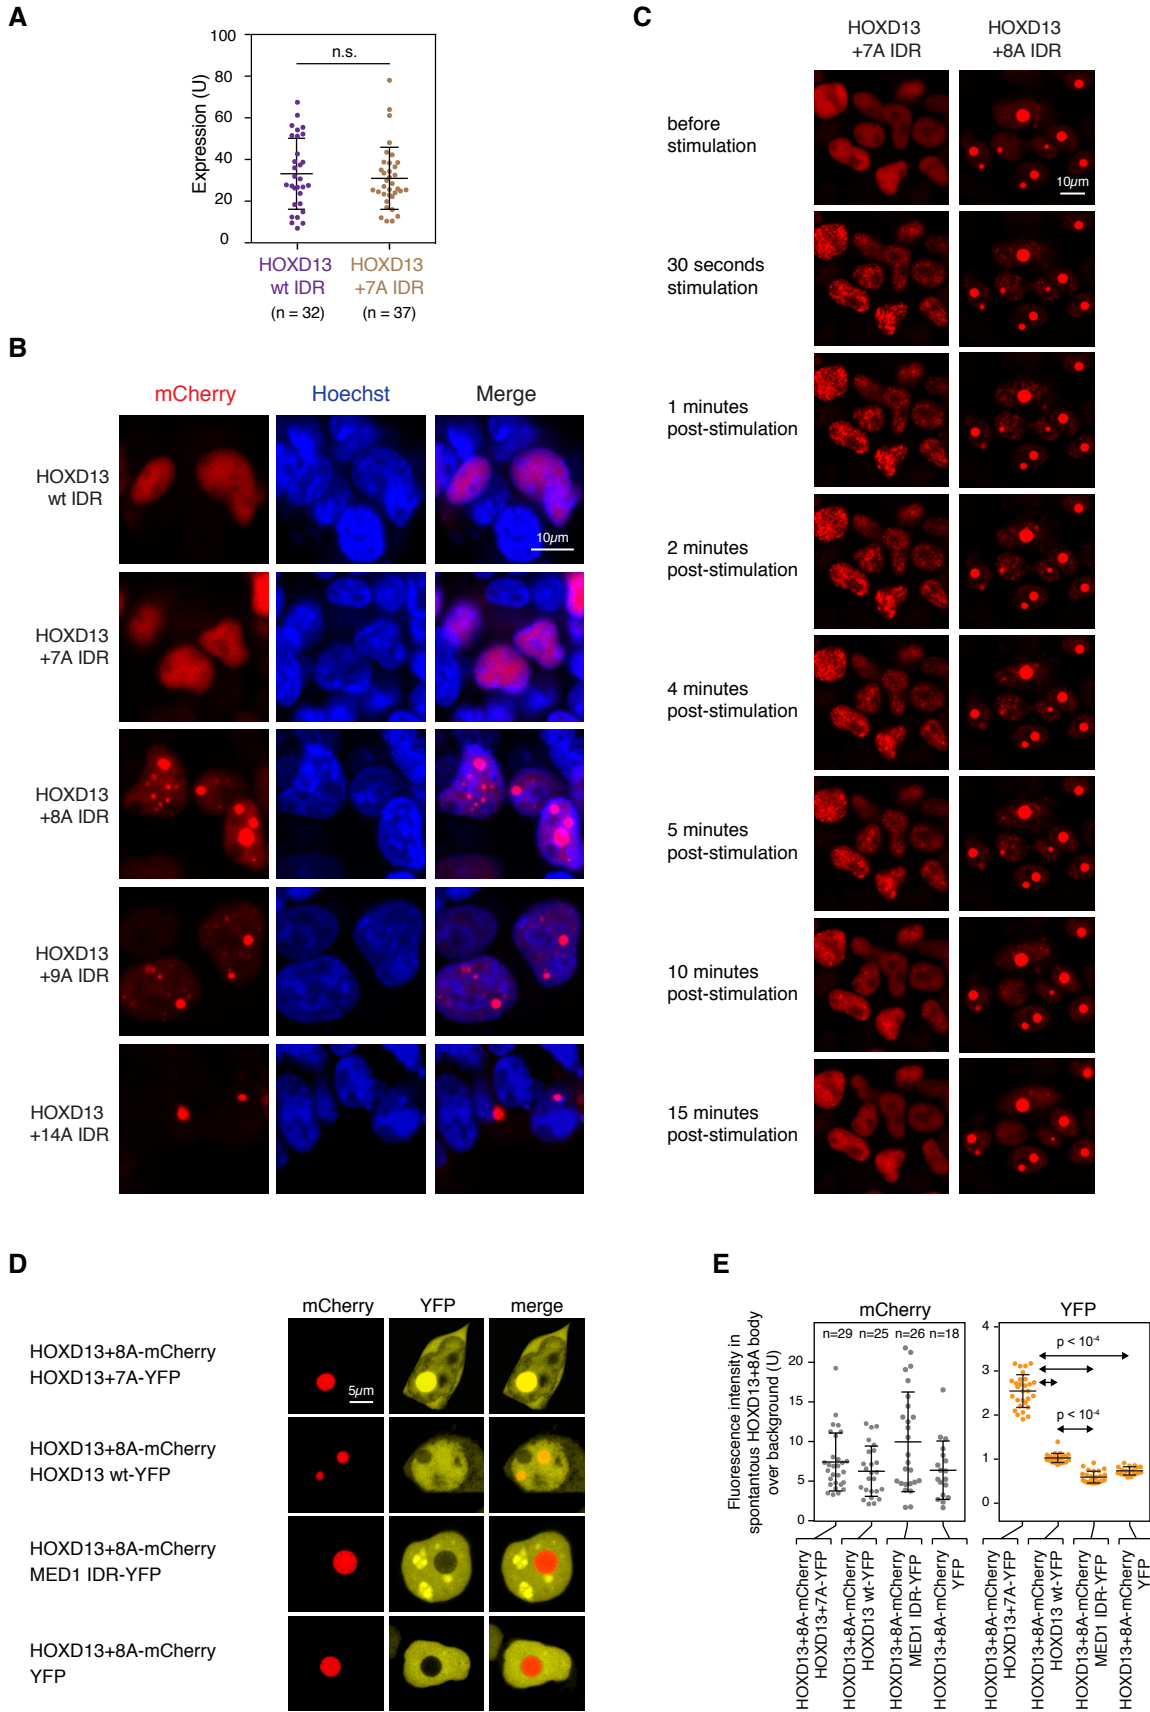

Supplement: NIHMS1586176-supplement-2.pdf [file NIHMS1586176-supplement-2.pdf]

**Figure S3**

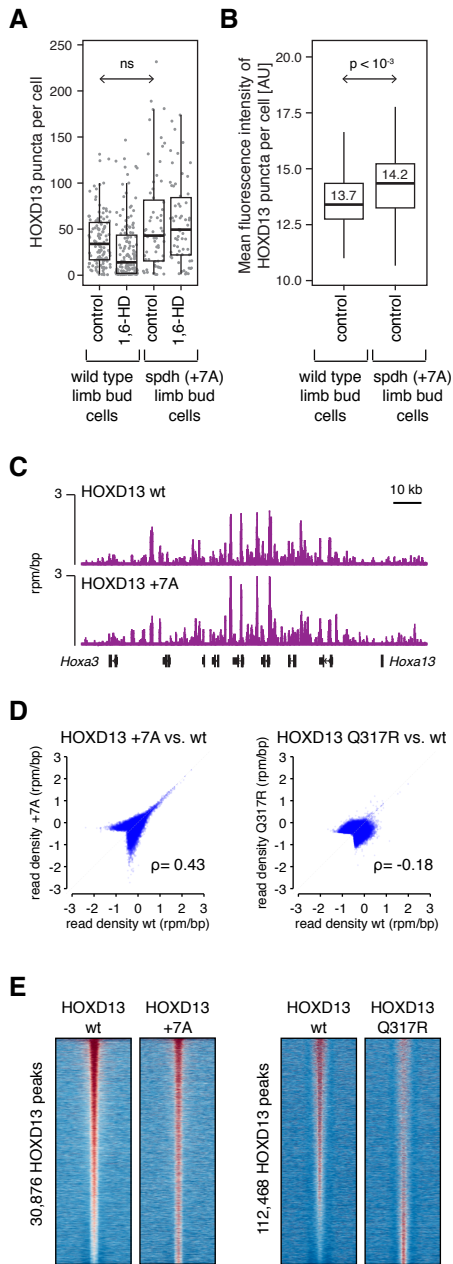

Supplement: NIHMS1586176-supplement-3.pdf [file NIHMS1586176-supplement-3.pdf]

# Figure S5

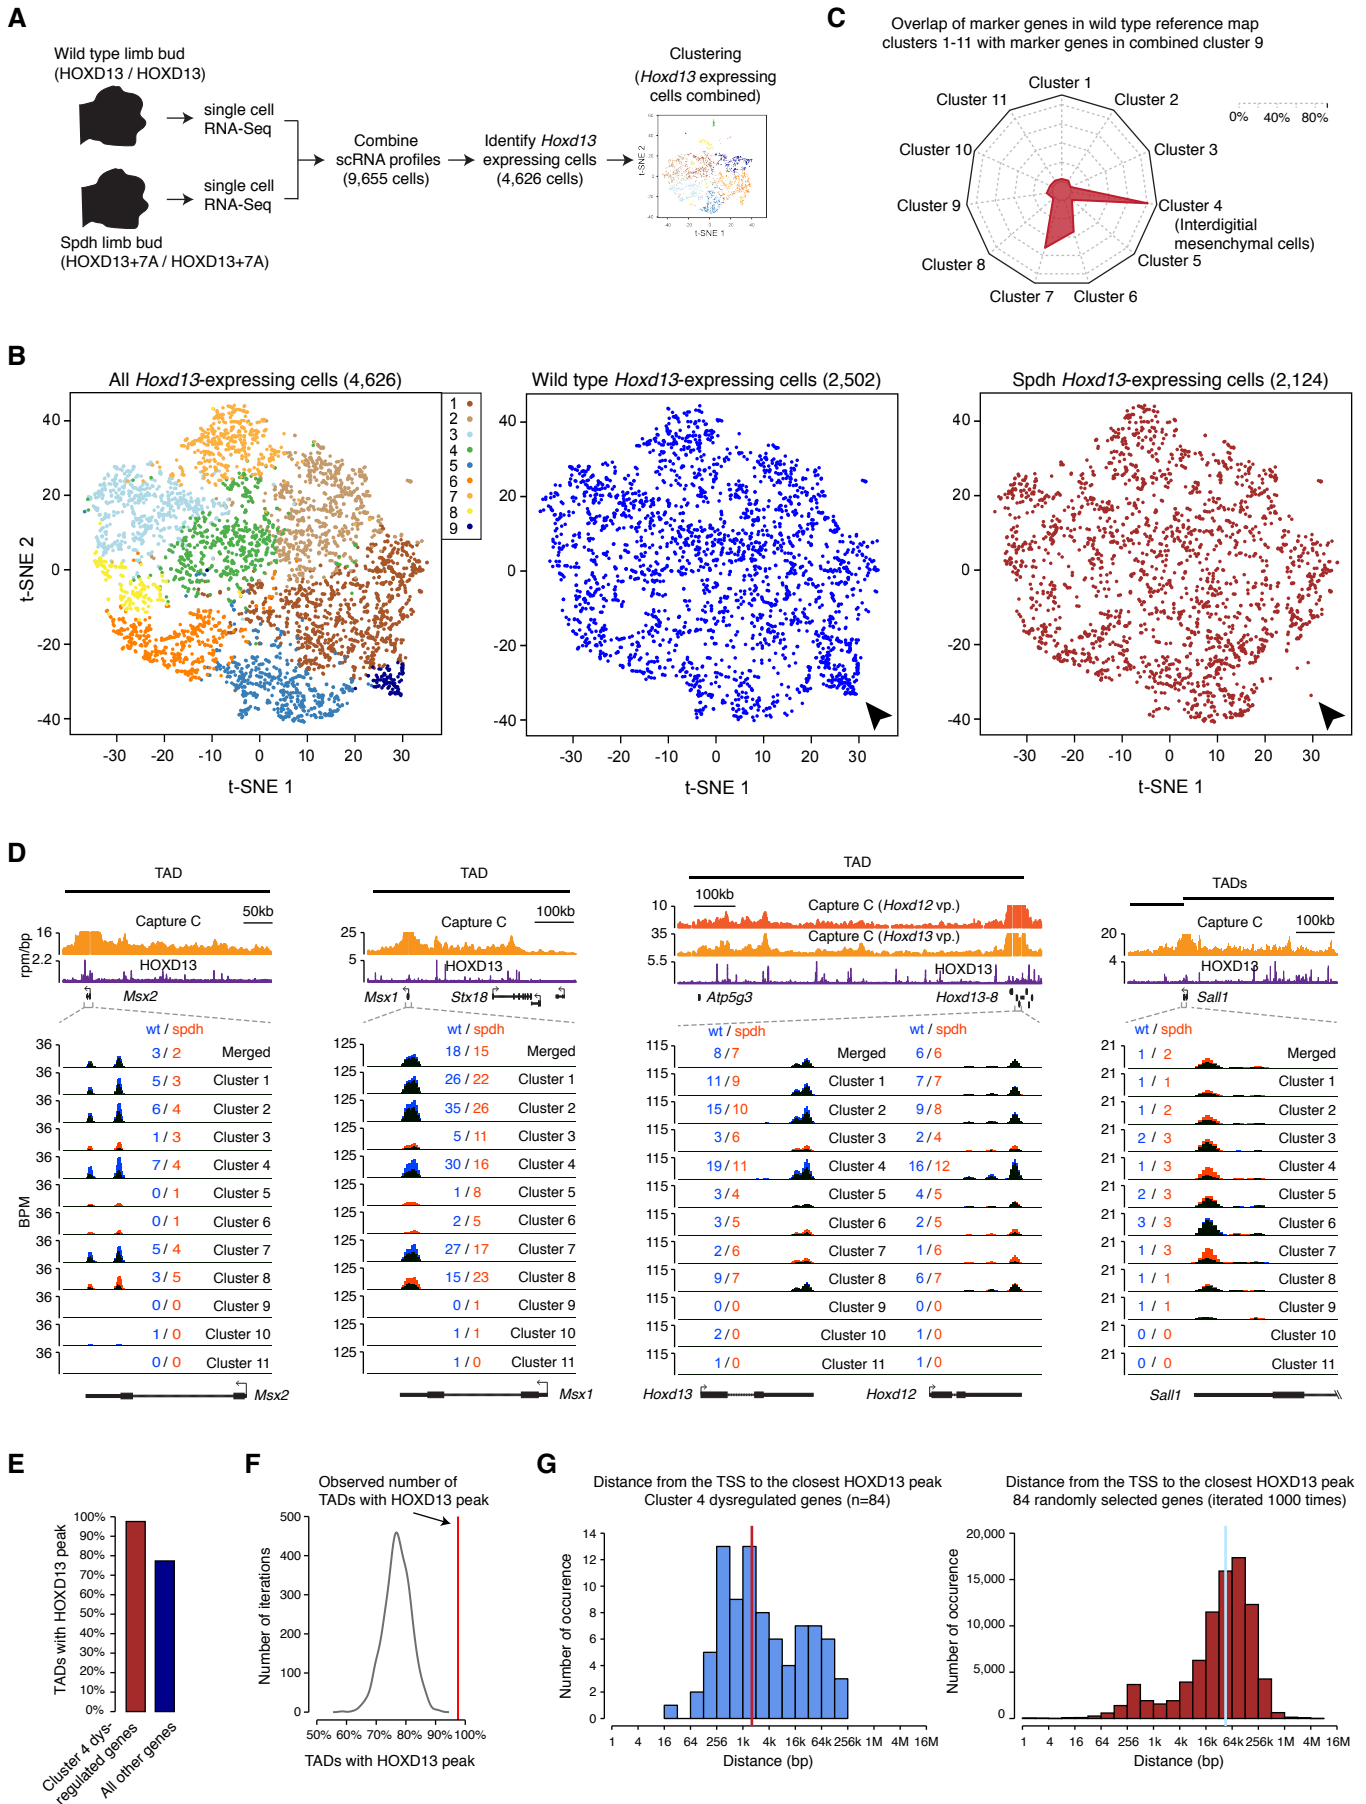

Supplement: NIHMS1586176-supplement-5.pdf [file NIHMS1586176-supplement-5.pdf]

**Figure S6**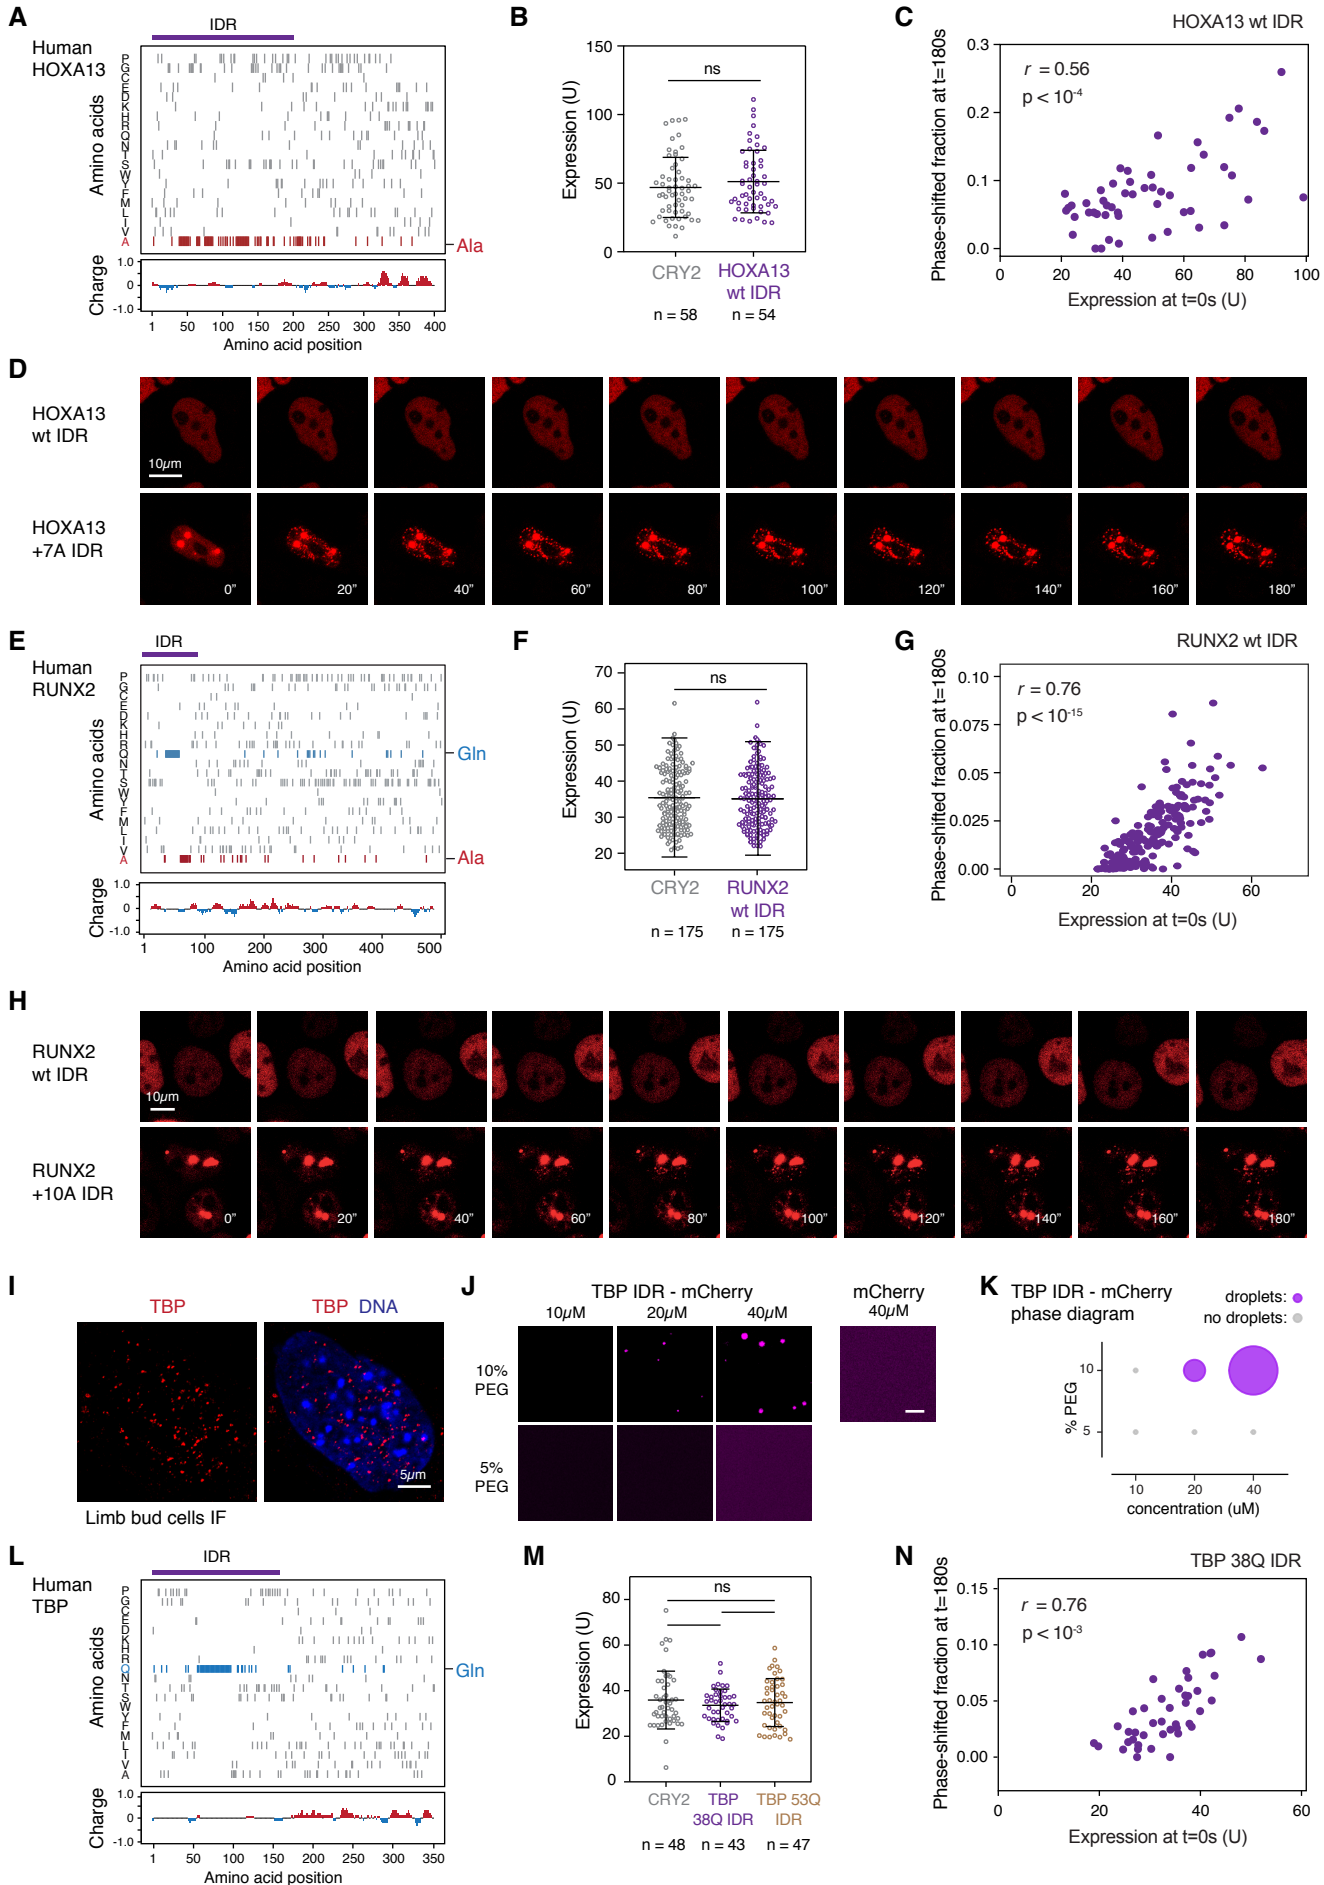

Supplement: NIHMS1586176-supplement-6.pdf [file NIHMS1586176-supplement-6.pdf]

**Figure S7**

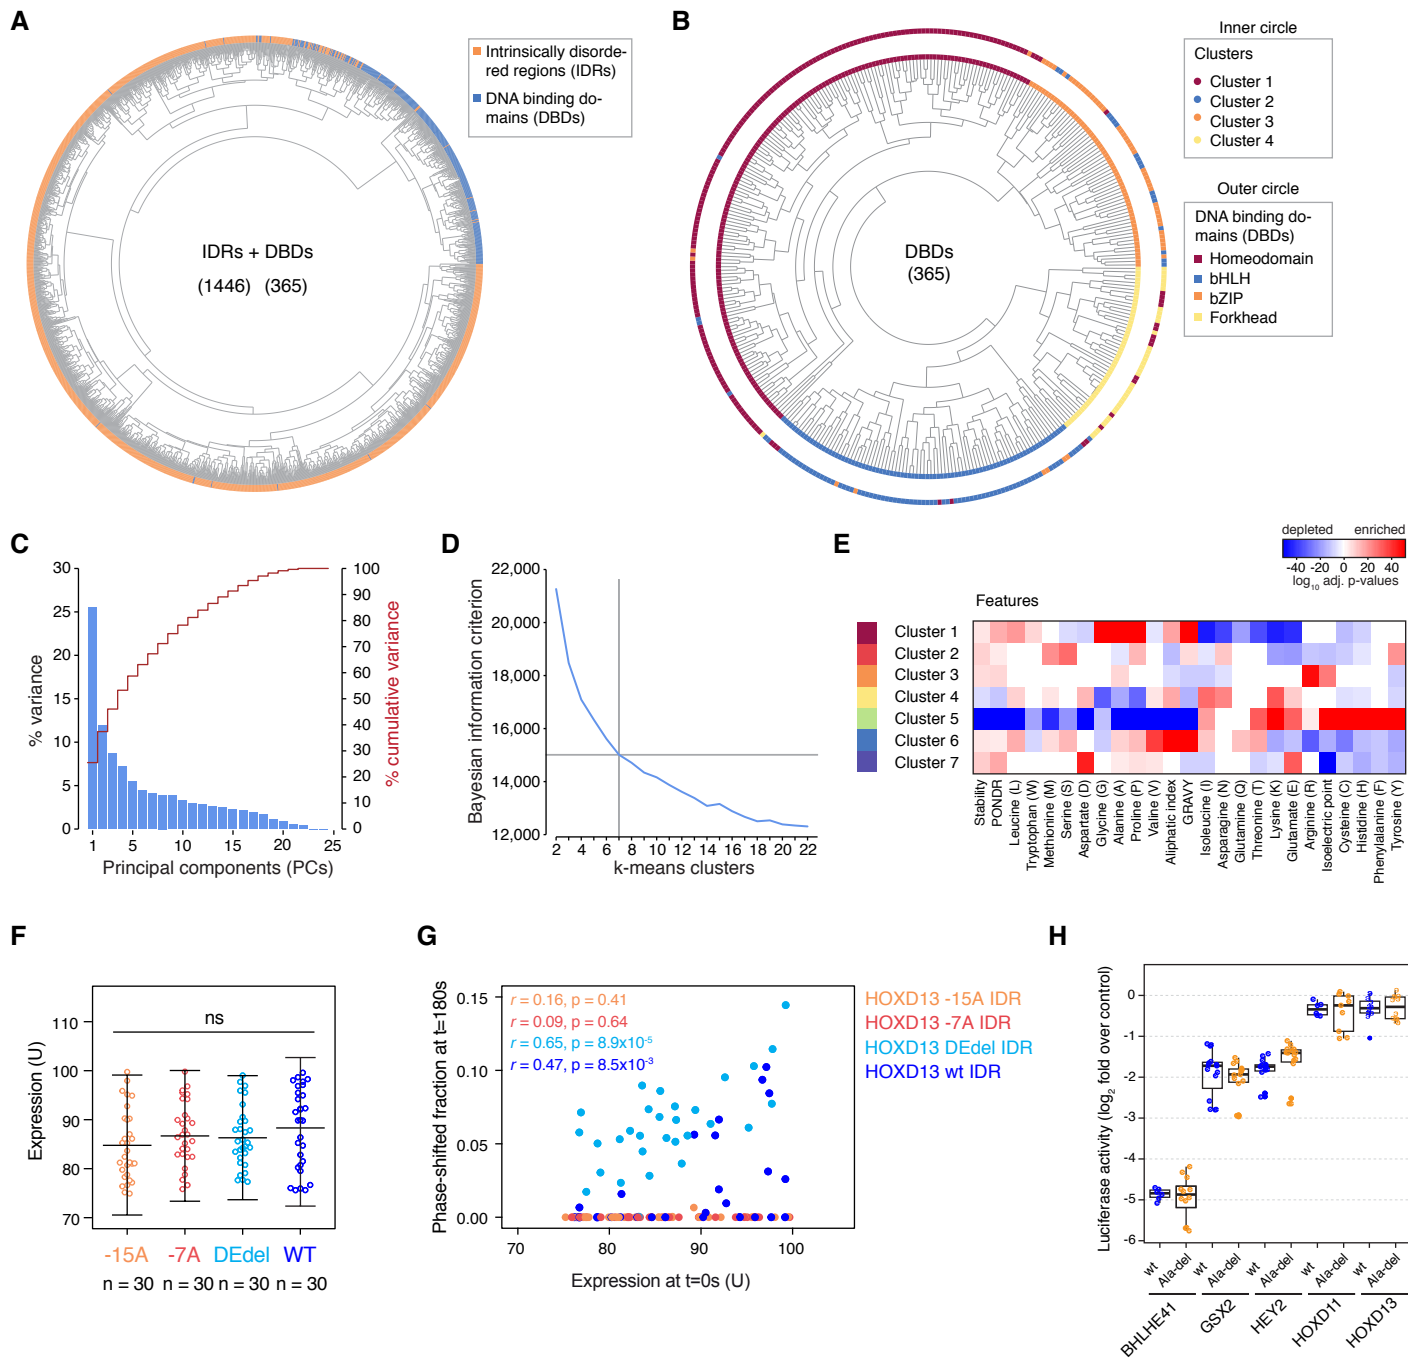

Supplement: NIHMS1586176-supplement-7.pdf [file NIHMS1586176-supplement-7.pdf]
